# Supplementary material
Source: publisher figshare collection journal article supplement (https://sage.figshare.com/ndownloader/files/21327438)
Supplement: Supplementary file 1 [file 21327438]

Details of study quality evaluation via the Newcastle-Ottawa Score system

| Study              | Definition of cases | Representativeness of cases | Selection of controls | Definition of controls | Control of age and gender | Control of other confounding factors | Ascertainment of exposure | Same methods for exposure ascertainment | Non-response rate | Total |
|--------------------|---------------------|-----------------------------|-----------------------|------------------------|---------------------------|--------------------------------------|---------------------------|-----------------------------------------|-------------------|-------|
| Spyridopoulos 2007 | 1                   | 1                           | 1                     | 1                      | 1                         | 1                                    | 1                         | 1                                       | 1                 | 9     |
| Liao 2013a         | 1                   | 1                           | 1                     | 1                      | 1                         | 1                                    | 1                         | 1                                       | 0                 | 8     |
| Liao 2013b-cauc    | 1                   | 1                           | 1                     | 1                      | 1                         | 1                                    | 1                         | 1                                       | 0                 | 8     |
| Liao 2013b-aa      | 1                   | 1                           | 1                     | 1                      | 1                         | 1                                    | 1                         | 1                                       | 0                 | 8     |
| Zhang 2015         | 1                   | 1                           | 1                     | 1                      | 1                         | 0                                    | 1                         | 1                                       | 0                 | 7     |
| Wang 2016          | 1                   | 1                           | 1                     | 1                      | 1                         | 0                                    | 1                         | 1                                       | 0                 | 7     |
| Choi 2016          | 1                   | 1                           | 1                     | 1                      | 1                         | 1                                    | 1                         | 1                                       | 0                 | 8     |
| Liao 2017          | 1                   | 1                           | 1                     | 1                      | 1                         | 1                                    | 1                         | 1                                       | 1                 | 9     |
| Wang 2019-dis      | 1                   | 1                           | 1                     | 1                      | 1                         | 0                                    | 1                         | 1                                       | 0                 | 7     |
| Wang 2019-val      | 1                   | 1                           | 1                     | 1                      | 1                         | 0                                    | 1                         | 1                                       | 0                 | 7     |

The study Liao 2013b included two sets of data from the Caucasians and the African Americans, which were included separately as Liao 2013b-cauc and Liao 2013b-aa;

The study Wang 2019 included two sets of data namely discovery cohort and validation cohort, which were included separately as Wang 2019-dis and Wang 2019-val;
